# Supplementary material for: Human umbilical cord blood-stem cells direct macrophage polarization and block inflammasome activation to alleviate rheumatoid arthritis
Source: PubMed Central journal article supplement (PMC5260999; doi:10.1038/cddis.2016.442), 2016-12-22

1 **Supplementary Information**

2

3 **Human Umbilical Cord Blood-Stem Cells Direct Macrophage Polarization**  
4 **and Block Inflammasome Activation to Alleviate Rheumatoid Arthritis**

5

6 Tae-Hoon Shin, Hyung-Sik Kim, Tae-Wook Kang, Byung-Chul Lee, Hwa-Yong Lee, Yoon-  
7 Jin Kim, Ji-Hee Shin, Yoojin Seo, Soon Won Choi, Seunghee Lee, Kichul Shin, Kwang-Won  
8 Seo, and Kyung-Sun Kang\*

9

10

11 **Running title: Regulation of macrophage function by MSCs in RA**

12

## 13 **Supplemental Figure Legends**

14

15 **Figure S1. Intravenously injected hUCB-MSCs are primarily distributed in the lung**  
16 **and joints and are excreted within one week.**

17 (A-D) Arthritis was induced by immunizing mice with bovine type II collagen (CII) mixture  
18 with complete Freund's adjuvant (CFA). hUCB-MSCs were infused intravenously (i.v.), and  
19 mice were sacrificed 2 hours (A), 3 days (B), 1 week (C) and 2 weeks (D) after cell injection.  
20 At the same time, DNA was obtained from the major organs. The concentration of  
21 xenogeneic hUCB-MSCs in mice with collagen-induced arthritis (CIA) was evaluated using  
22 real-time qPCR with the human-specific ALU gene. (E-F) Changes in the distribution of  
23 injected cells throughout the joint (E) and lung tissue (F) were analyzed over time. 3 mice  
24 were included in each time point, and the detection limit was determined on the basis of the  
25 standard curve (0.003% of the human ALU gene).

26

27 **Figure S2. Differentiation and characterization of human umbilical cord blood- and**  
28 **THP-1 cell-derived macrophages.**

29 (A) Similarities between human umbilical cord blood- (hUCB-) and THP-1 cell-derived  
30 macrophages were determined using the following protocols. (B) Representative phase-  
31 contrast images of fully differentiated macrophages, scale bar = 100  $\mu$ m. (C) The expression  
32 of CD68, a typical macrophage lineage marker, was confirmed with immunocytochemistry  
33 (ICC), scale bar = 50  $\mu$ m. Data are representative of three independent experiments. (D)  
34 Identification of various immune cell populations in hUCB-derived mononuclear cells and  
35 the purity of CD14-sorted monocyte/macrophage populations from two different donors was  
36 evaluated with flow cytometry. Data in table are presented as the mean  $\pm$  SD from the  
37 cumulative results of at least three independent experiments. (E-F) The relative proportion of

38 each immune cell population, including lymphocytes, granulocytes and monocytes, was  
39 determined with flow cytometry with specific lineage markers. The results are shown as the  
40 mean  $\pm$  SD from three independent experiments. **(G)** Representative surface marker  
41 expression on fully differentiated hUCB- and THP-1-derived macrophages was analyzed with  
42 flow cytometry. One representative of at least three independent experiments is shown.

43

44

45 **Figure S3. Enhanced COX-2 and/or TSG-6 signaling in hUCB-MSCs upon TNF- $\alpha$  and**  
46 **IL-1 $\beta$  stimulation contributes to macrophage regulation.**

47 **(A)** The expression of CD206 by CD14<sup>+</sup> macrophages after co-culture with hUCB-MSCs in  
48 direct contact or transwell conditions was determined with flow cytometry. **(B)** hUCB-MSCs  
49 obtained from two different donors were cultured with or without recombinant human TNF- $\alpha$   
50 for 2 days, after which the protein levels of the pivotal factors COX-2 and TSG-6 were  
51 quantified with western blotting. **(C-D)** The expression of these factors was altered after pre-  
52 incubation with conditioned medium from macrophages (C) or pre-treatment with IL-1 $\beta$  (D).  
53 One representative experiment of three or the cumulative of at least three independent  
54 experiments are shown. The results are shown as the mean  $\pm$  SD. \*\*\* P<0.001 (one-way  
55 ANOVA followed by the Bonferroni post hoc test).

56

57

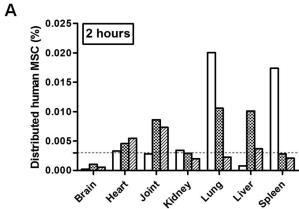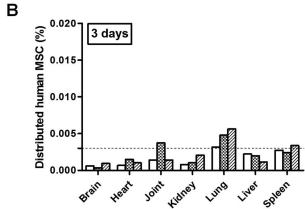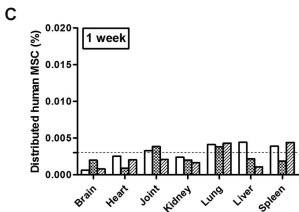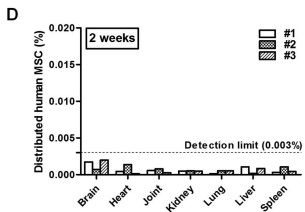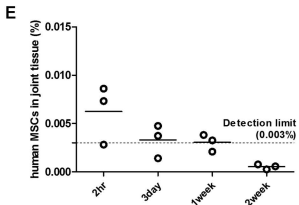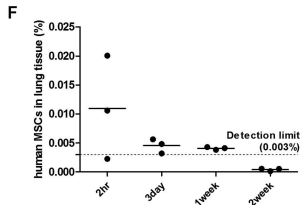

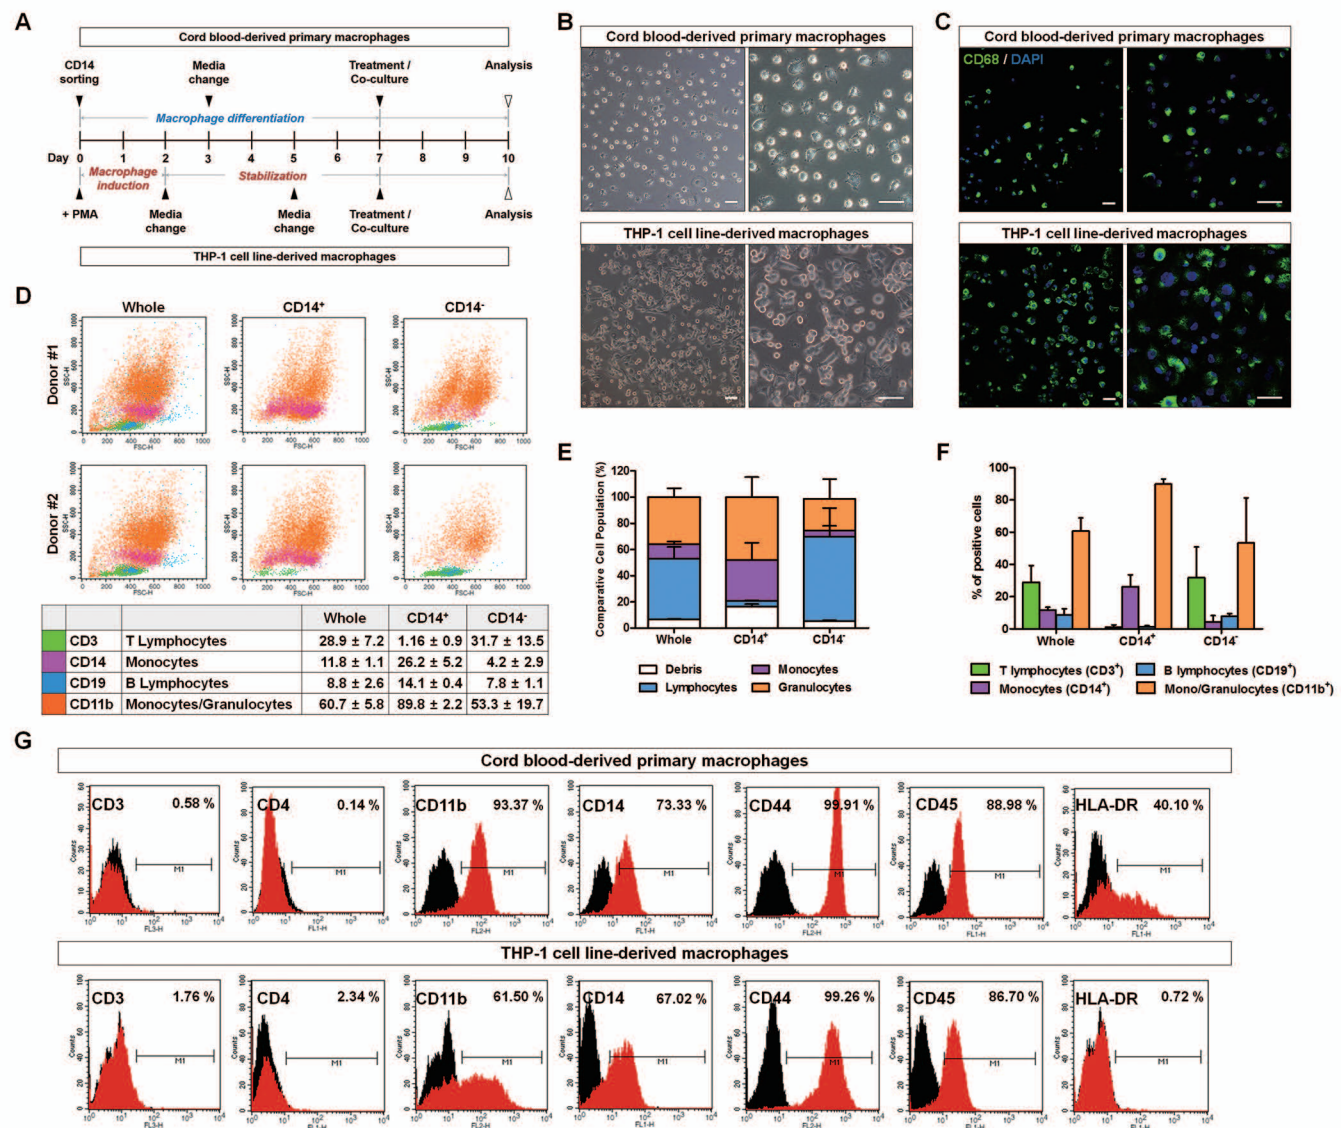

**A**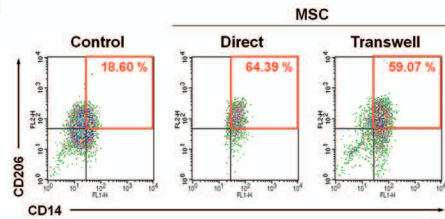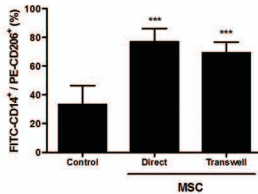**B**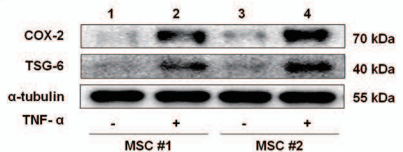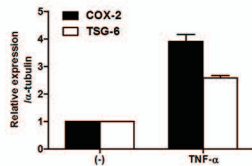**C**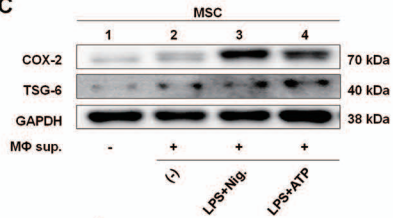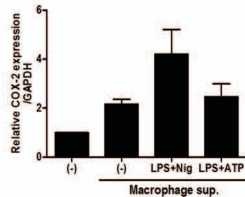**D**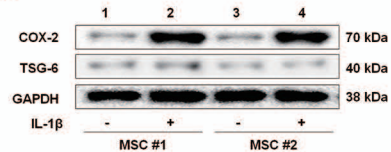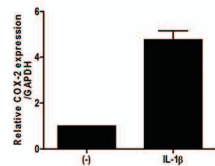

Supplement: cddis2016442x1.pdf [file cddis2016442x1.pdf]
